# Supplementary figures and images for: Spermidine alleviates experimental autoimmune encephalomyelitis through inducing inhibitory macrophages
Source: PubMed Central journal article supplement — Cell Death Differ. 2016 Jul 22;23(11):1850–61. doi: 10.1038/cdd.2016.71 (PMC5071574; doi:10.1038/cdd.2016.71), 2016-07-22

**a**

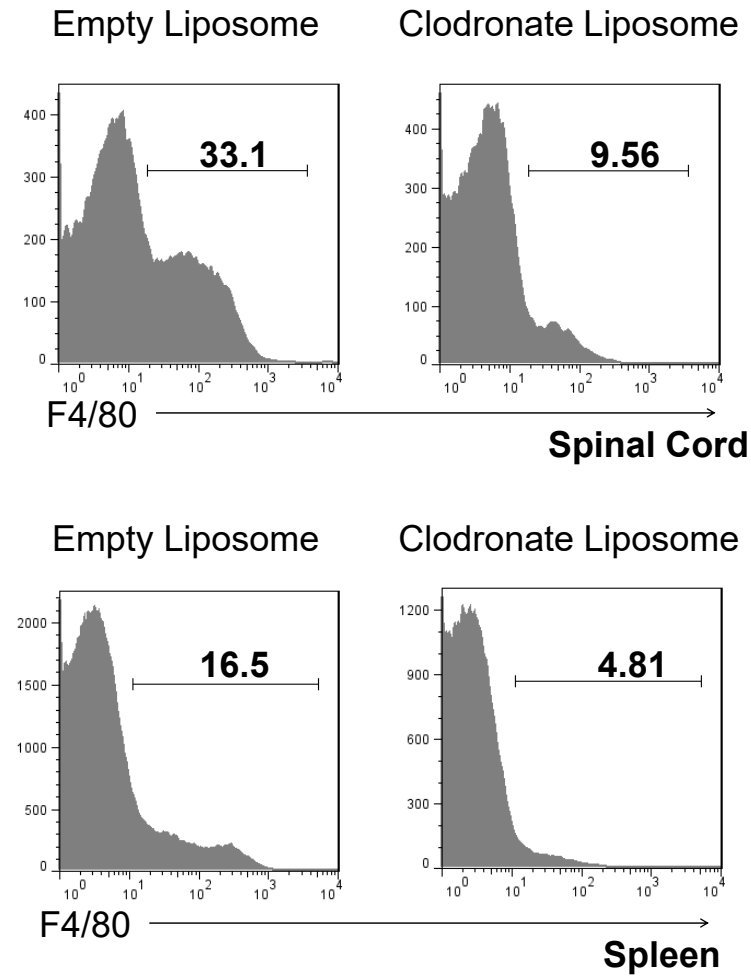

**a**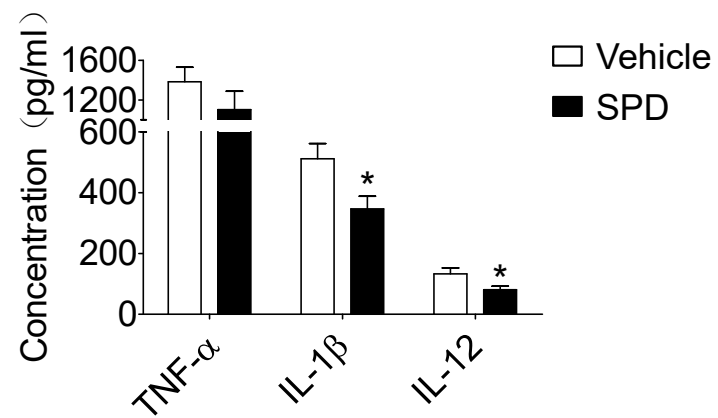**b**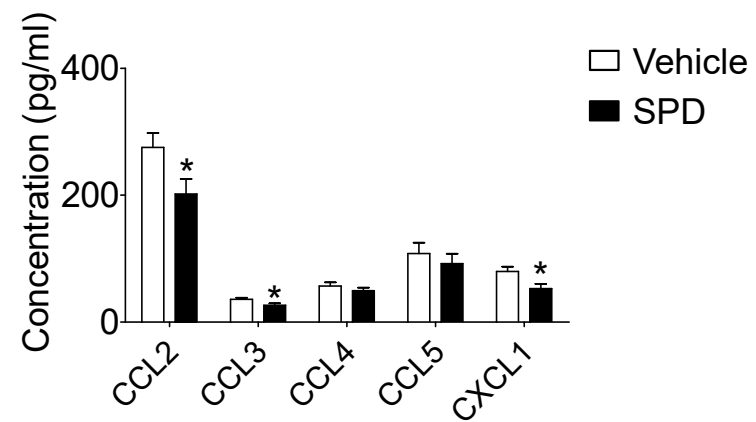

**a**

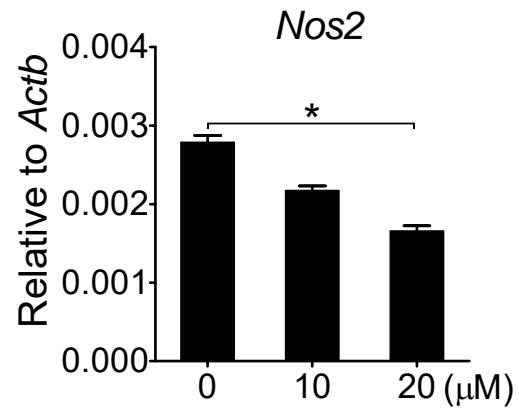

**b**

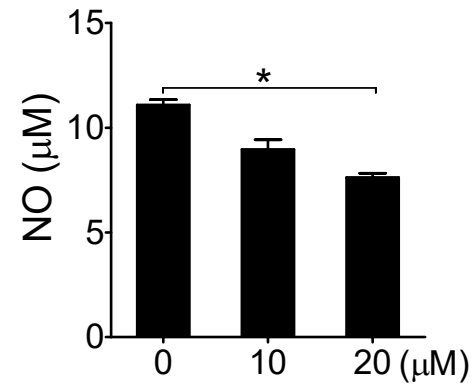

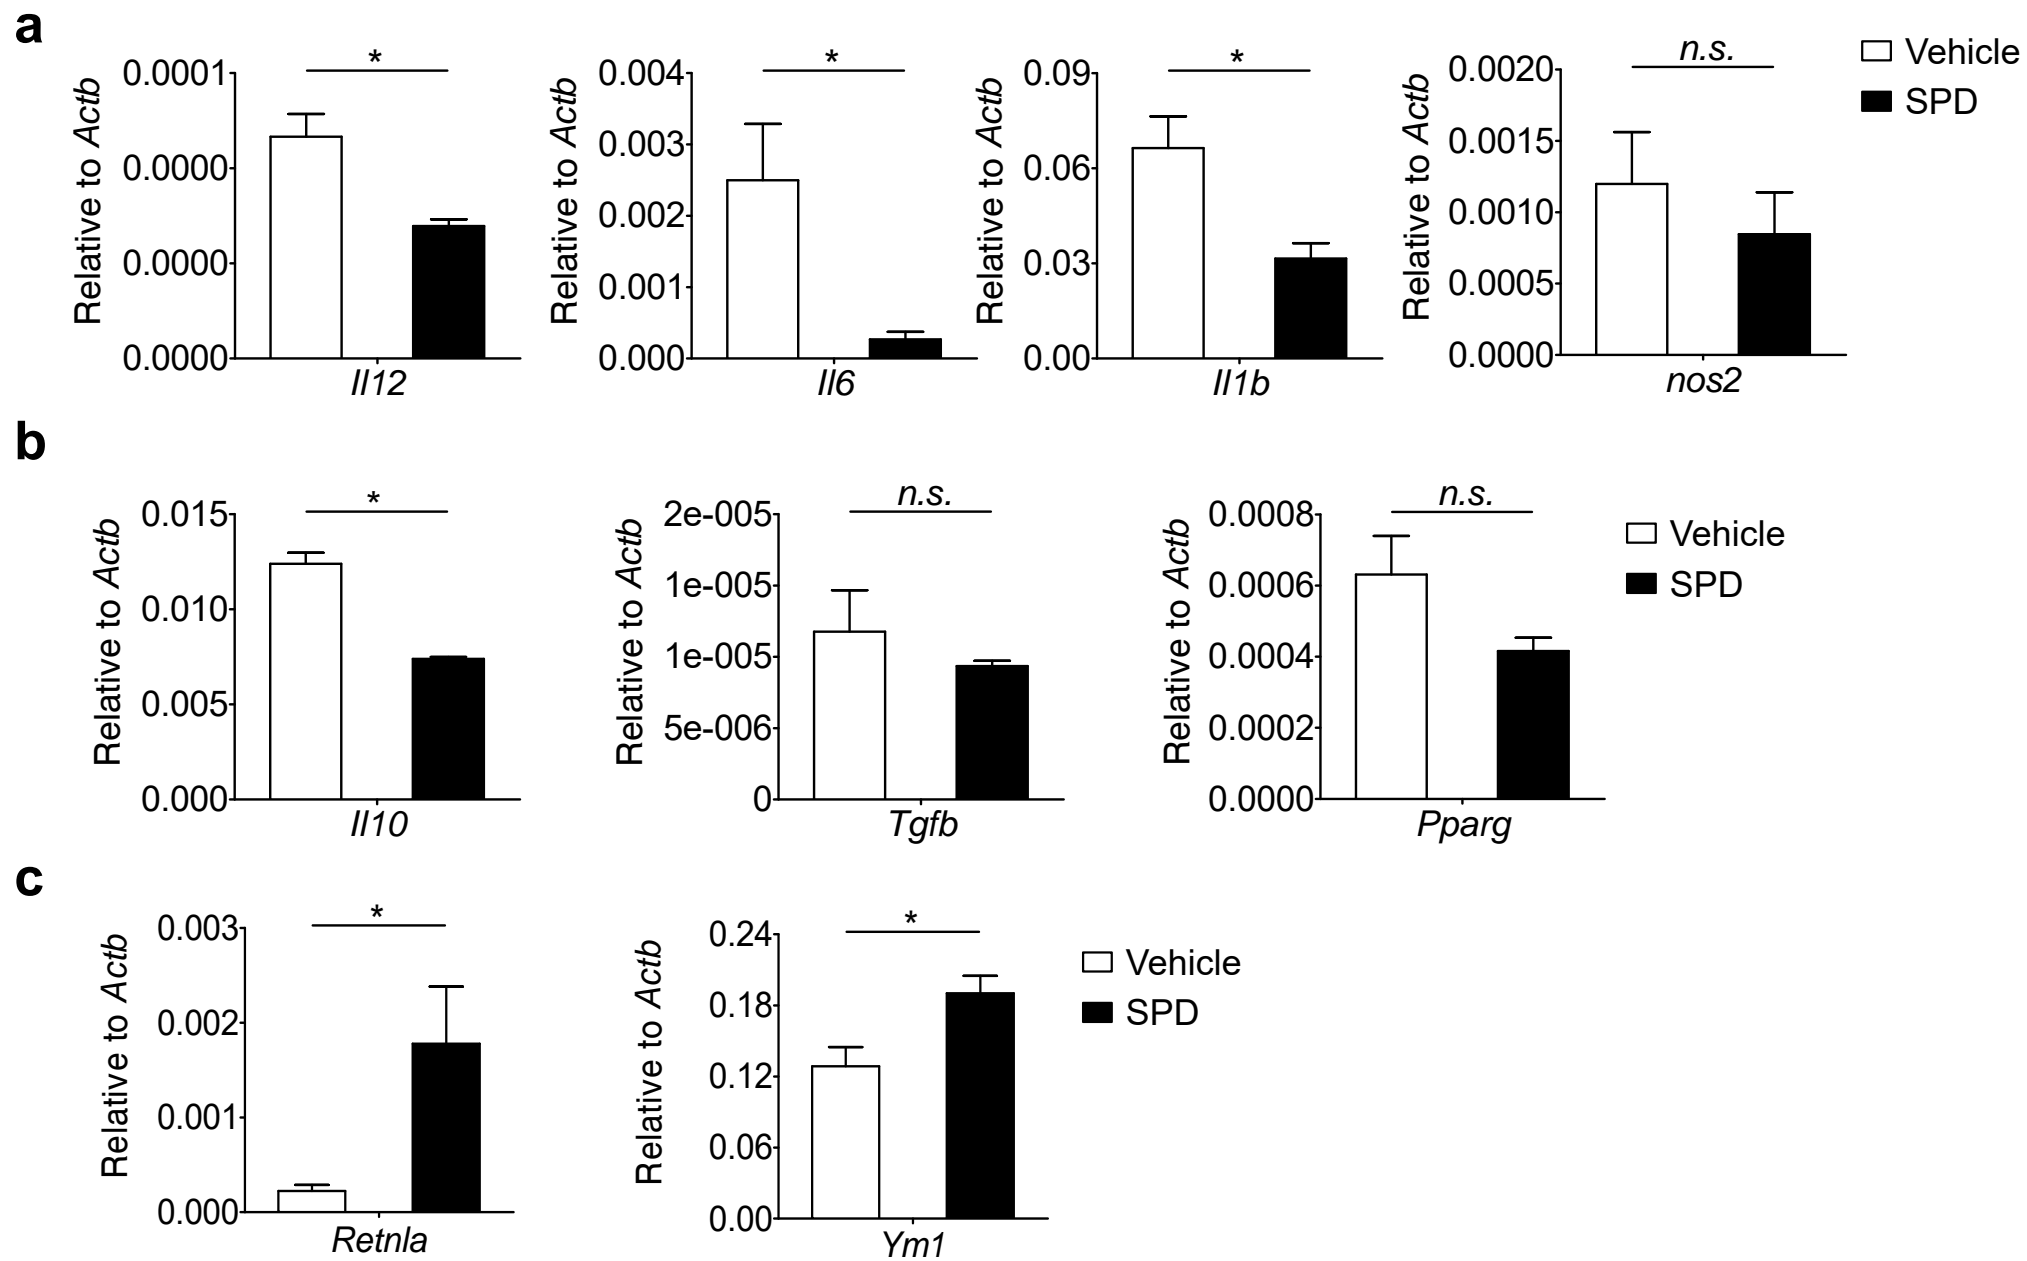

**a**

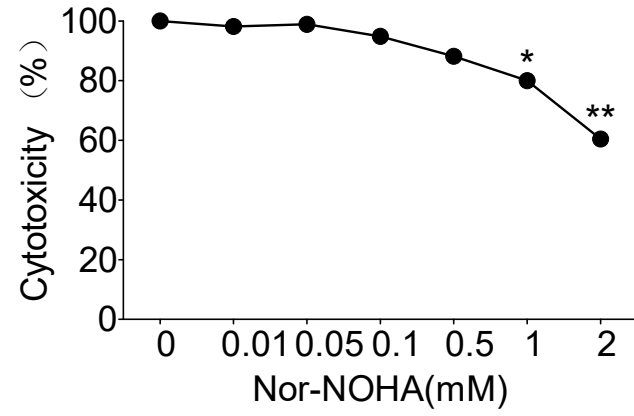

**b**

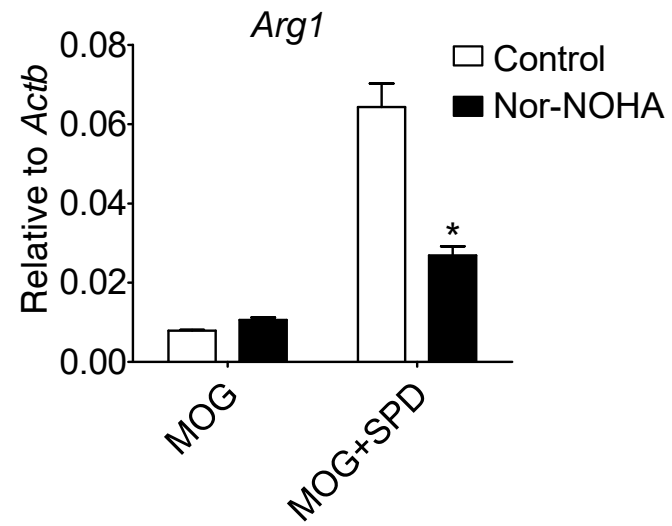

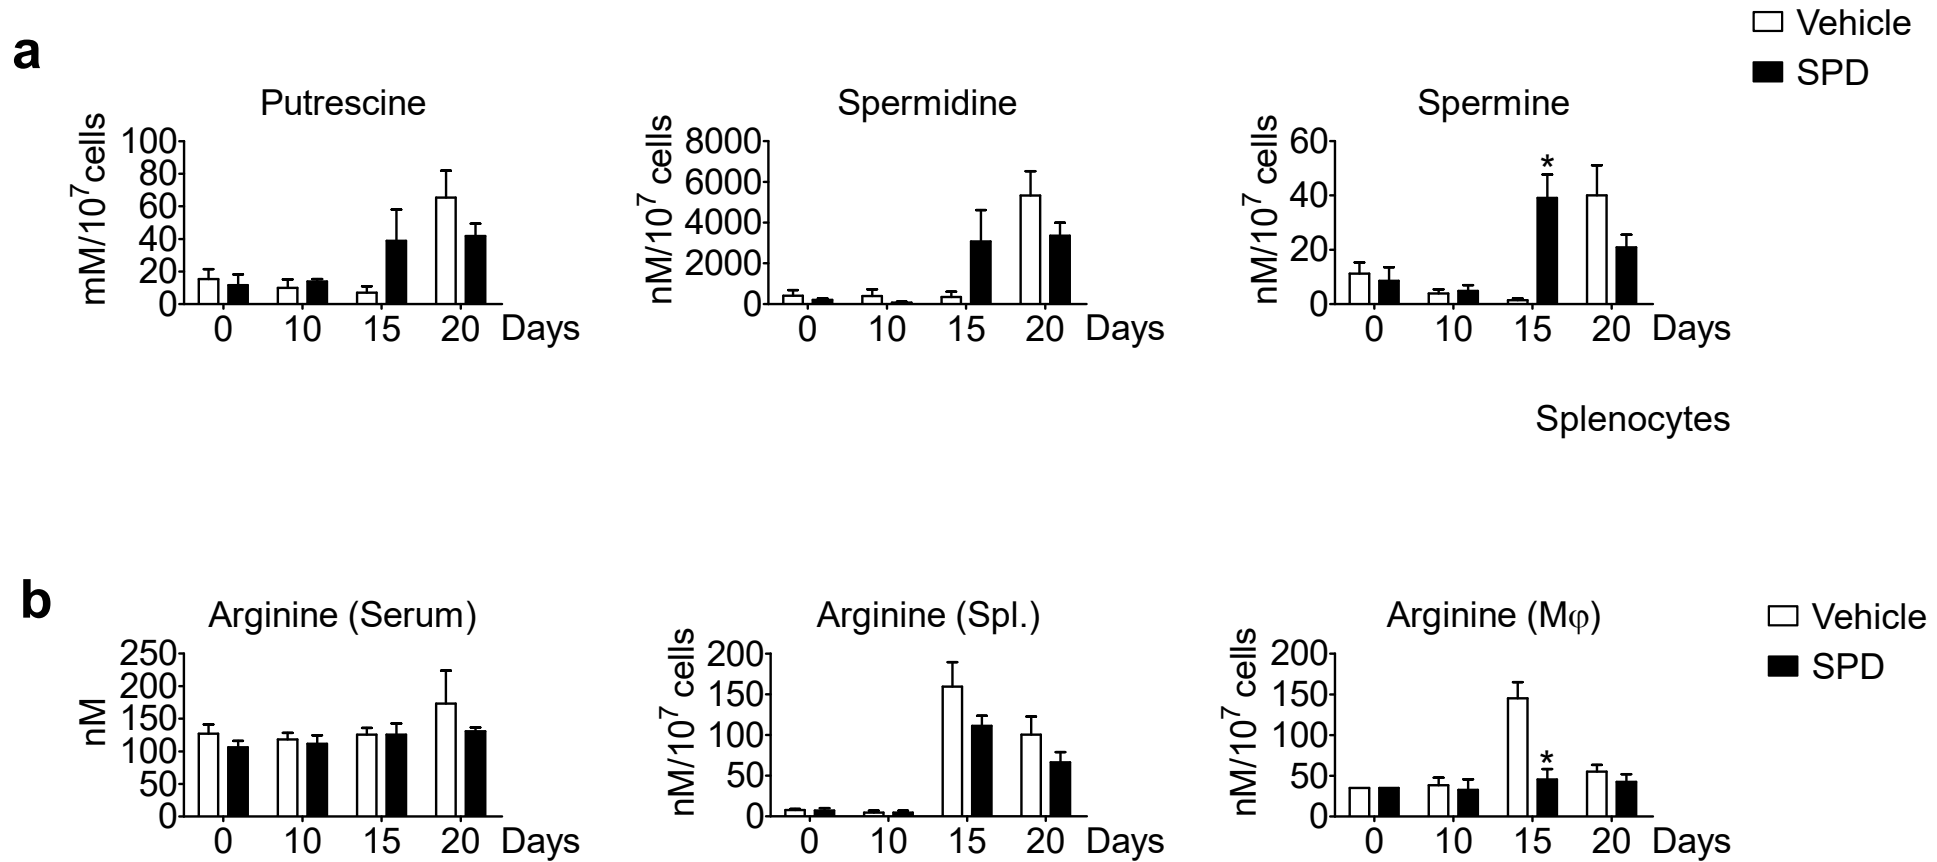

Supplement: cdd201671x1.pdf [file cdd201671x1.pdf]
